# Supplementary material
Source: PubMed Central journal article supplement (PMC3078810)

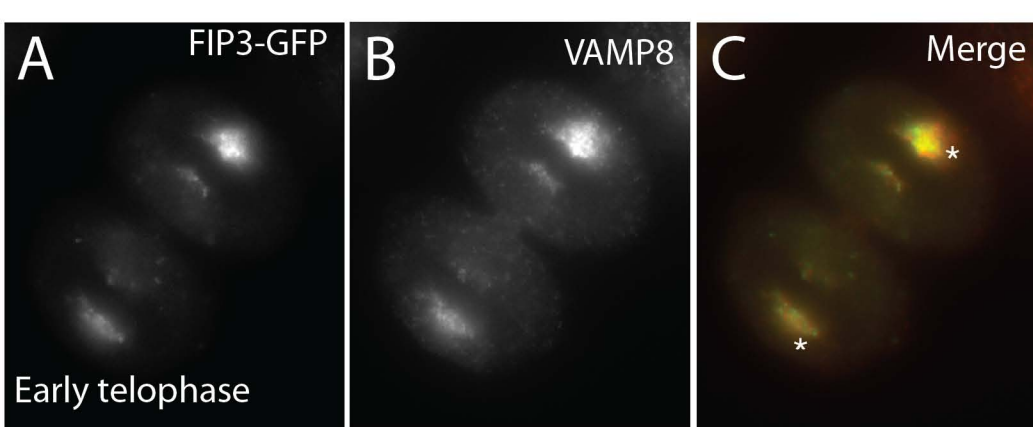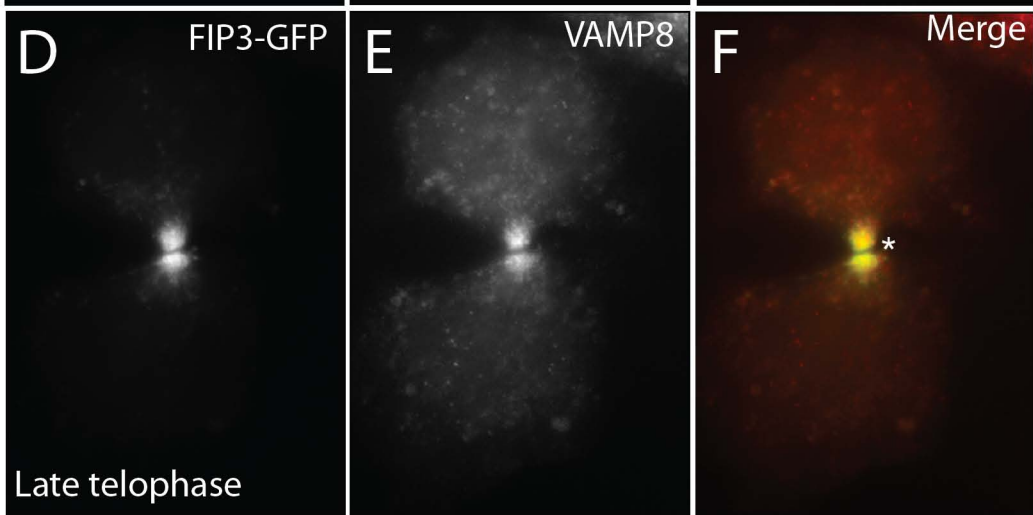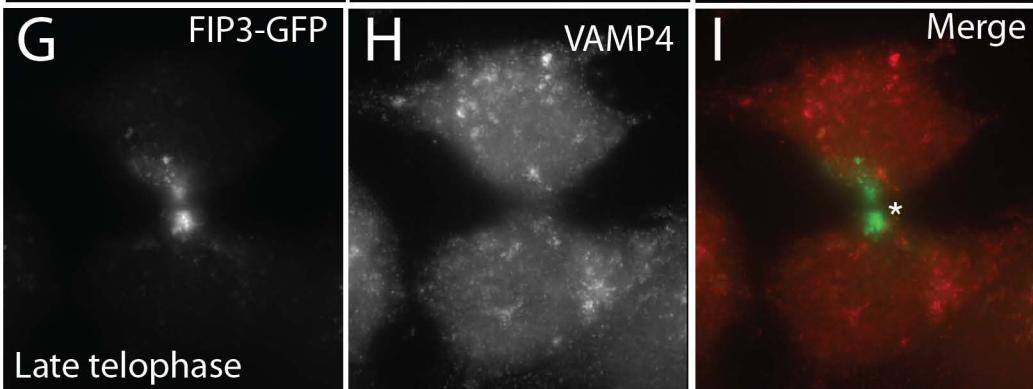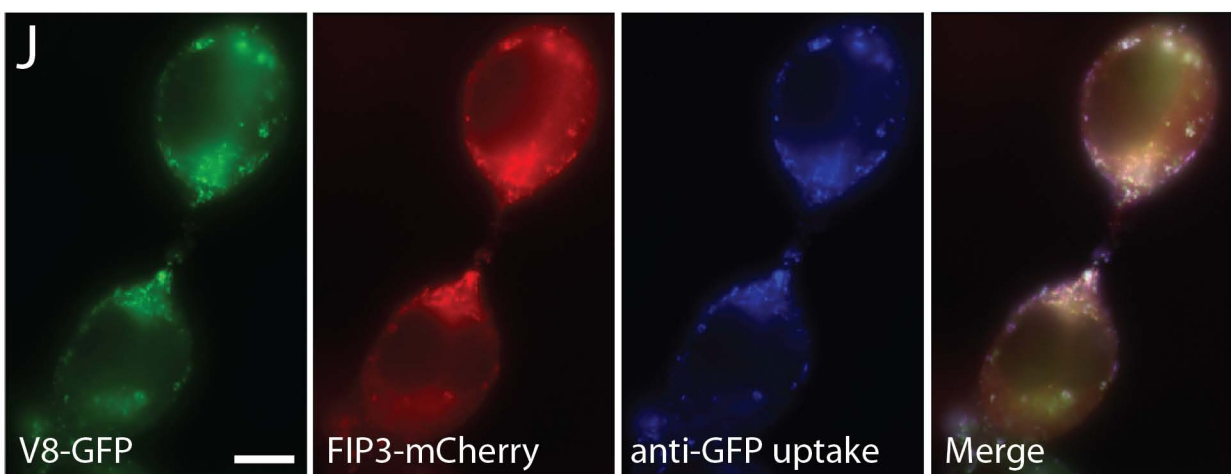

Supplement: jcs.081448_1.pdf [file jcs.081448_1.pdf]

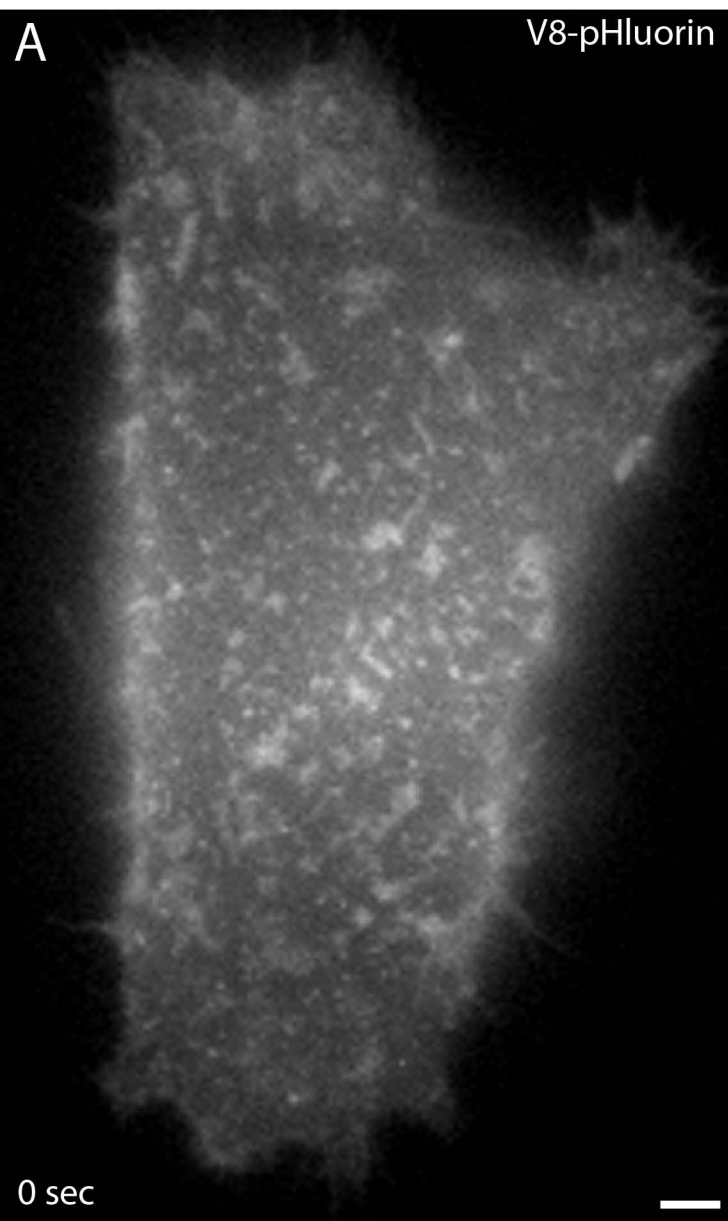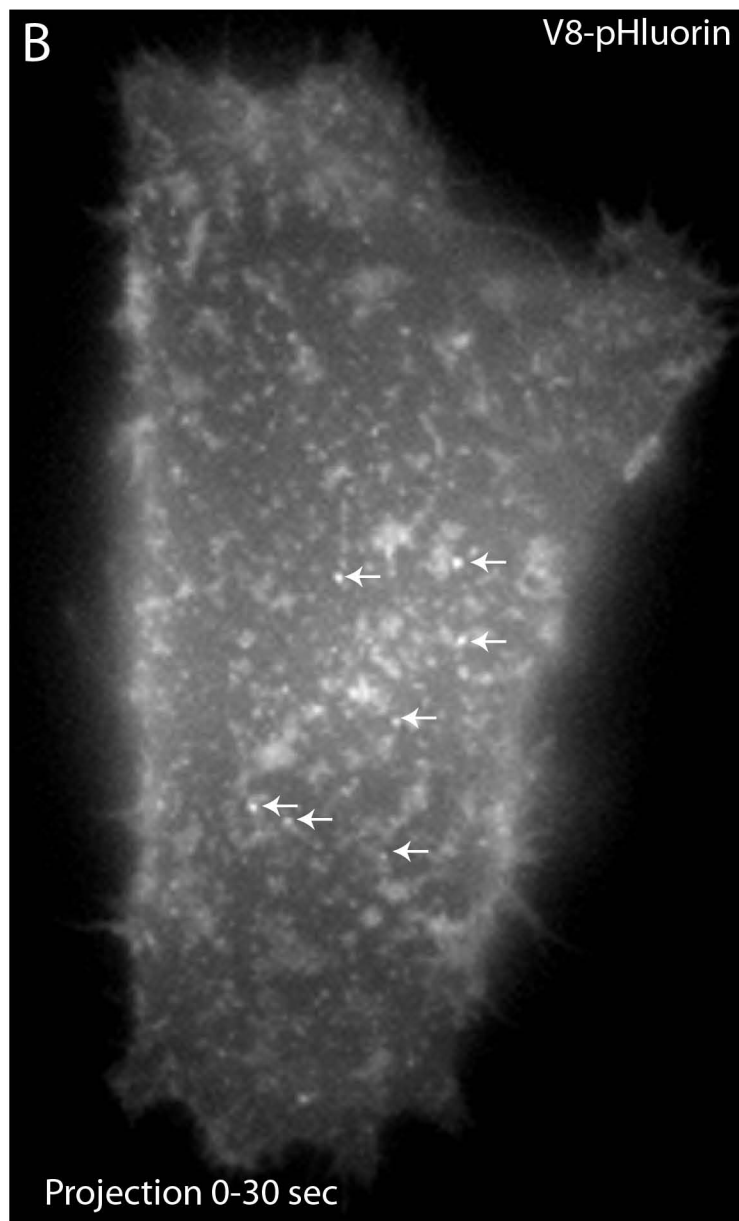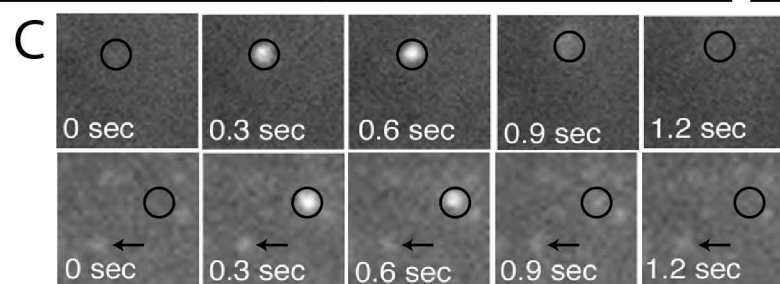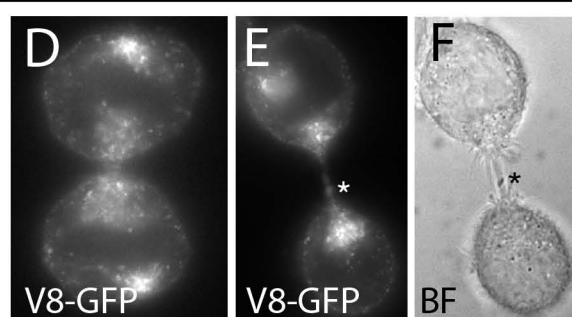

Single-vesicle fusion mean life-time (T) and amplitude (A)

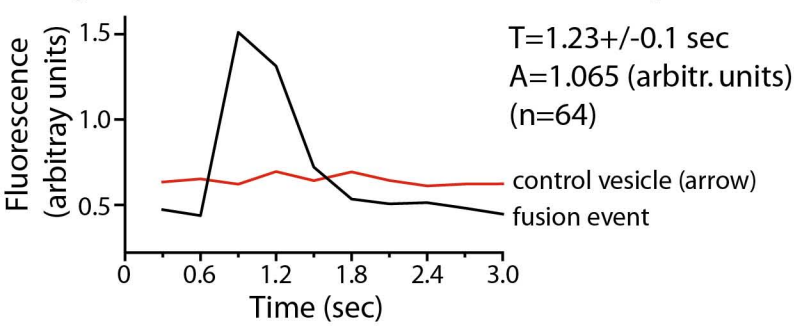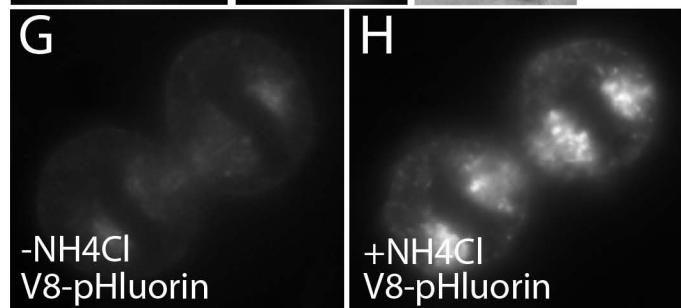

Supplement: jcs.081448_2.pdf [file jcs.081448_2.pdf]

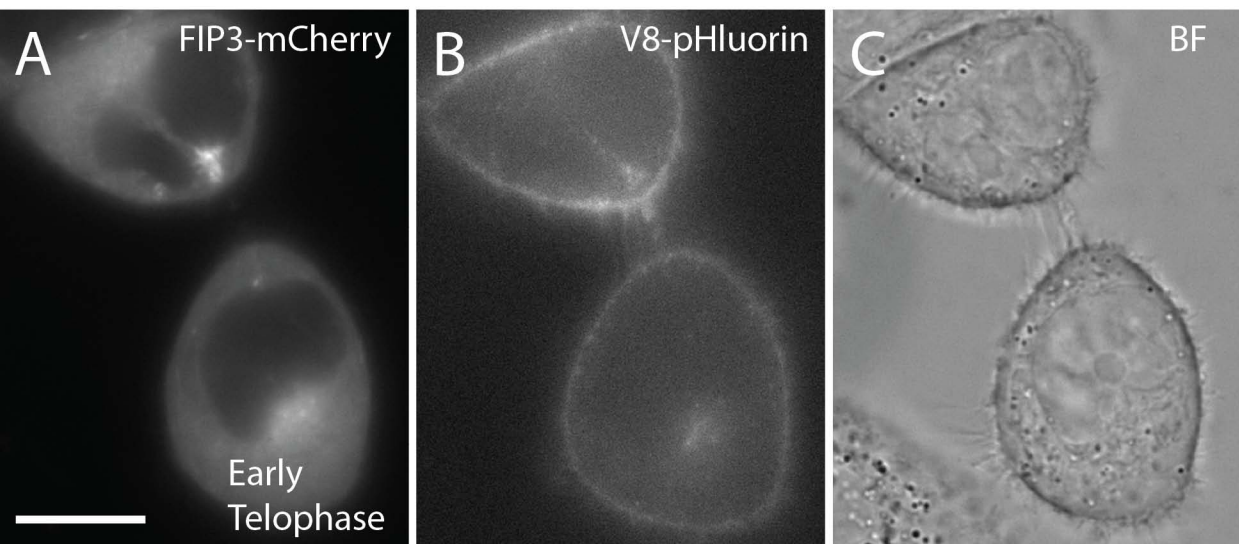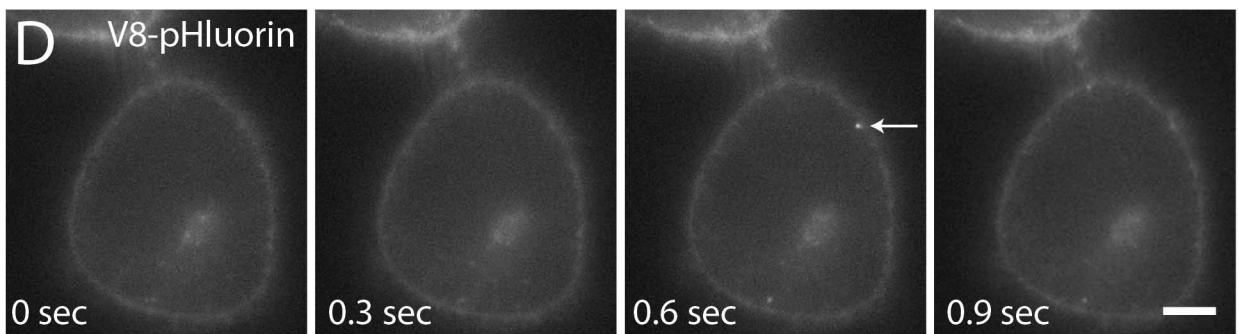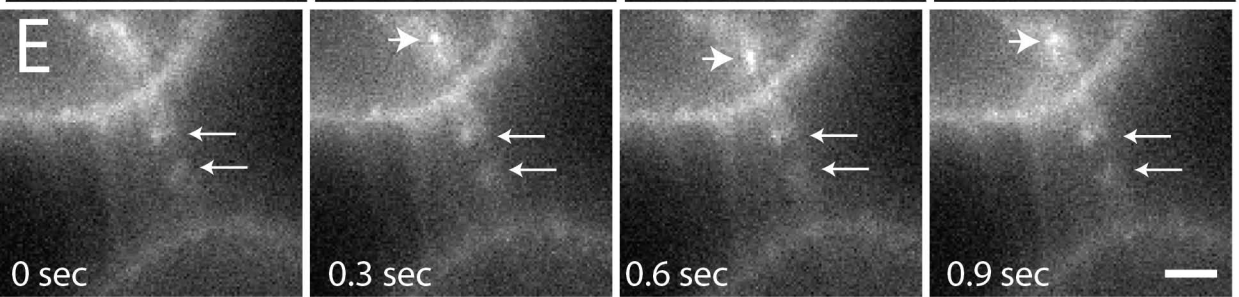

Supplement: jcs.081448_3.pdf [file jcs.081448_3.pdf]

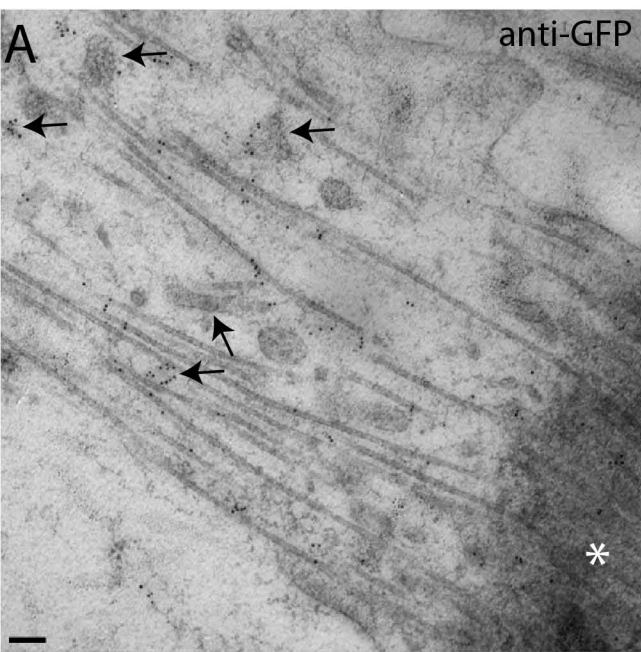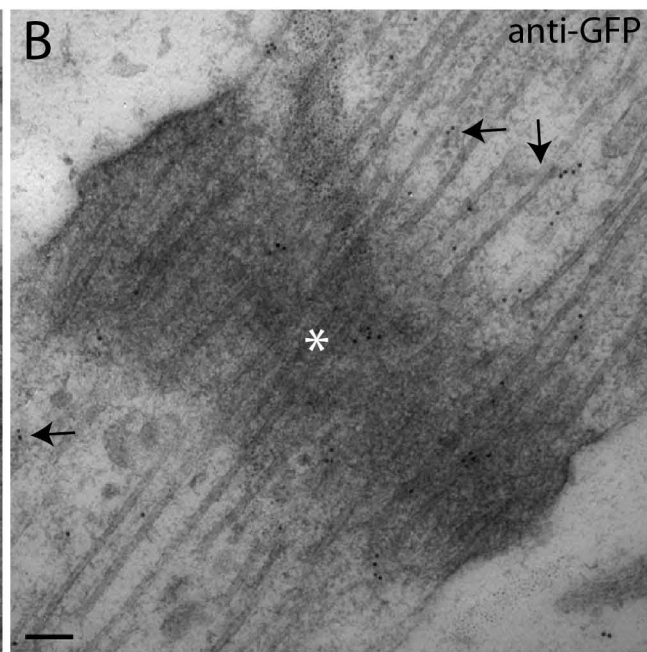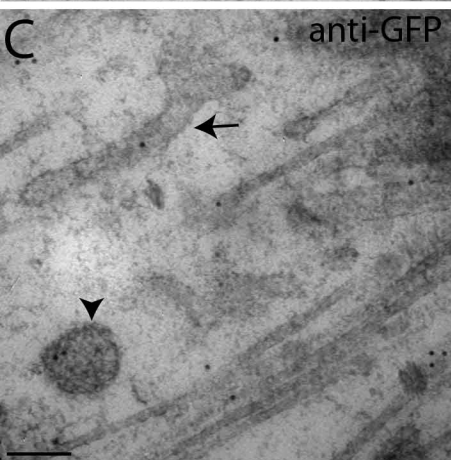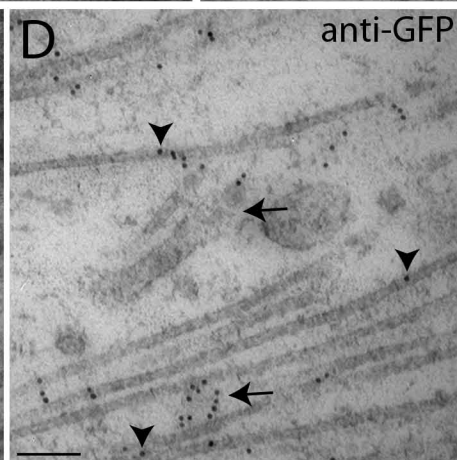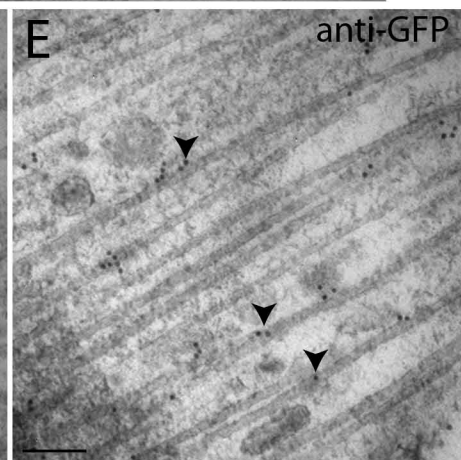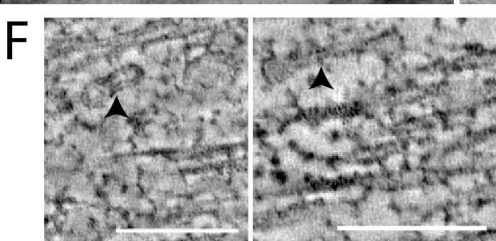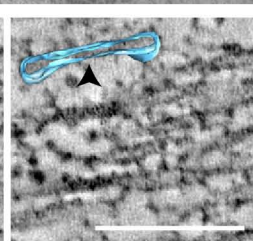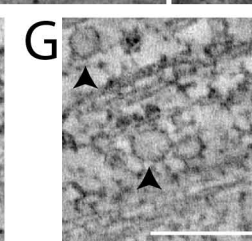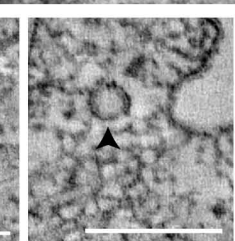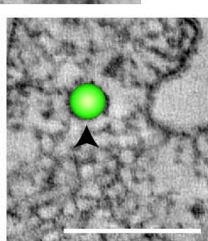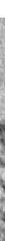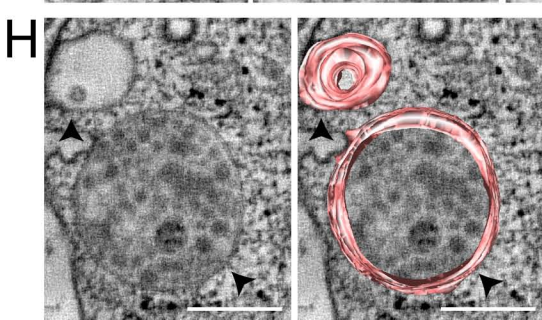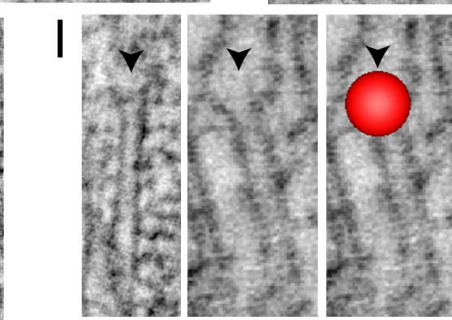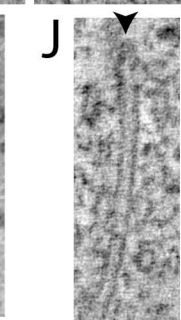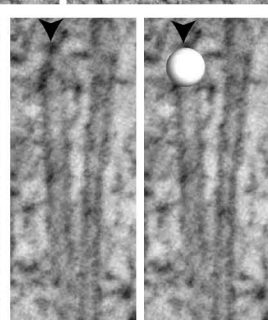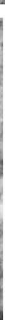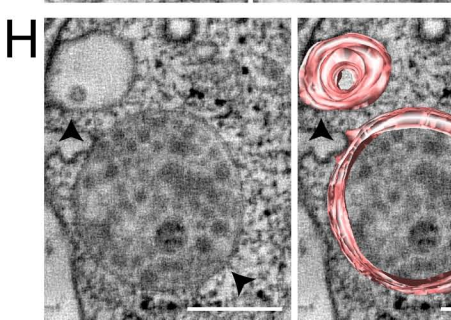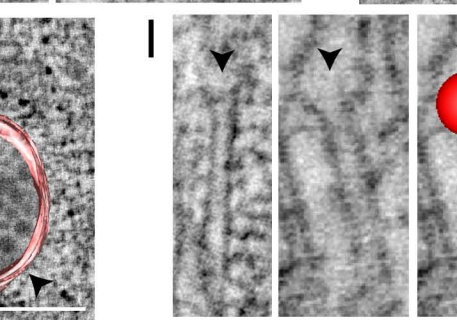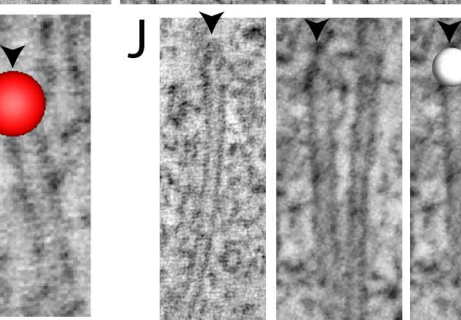

Supplement: jcs.081448_4.pdf [file jcs.081448_4.pdf]

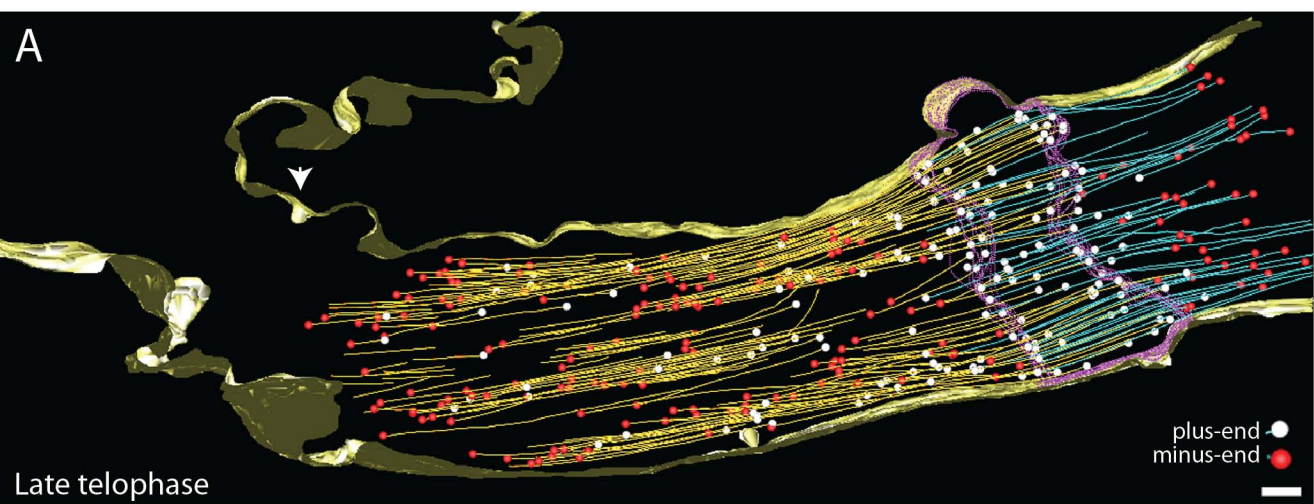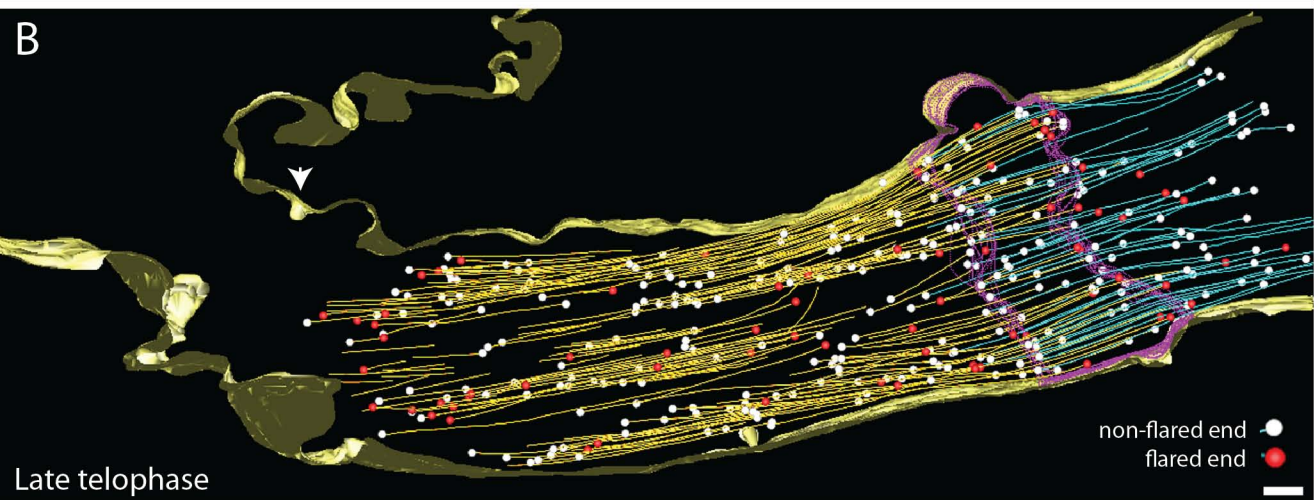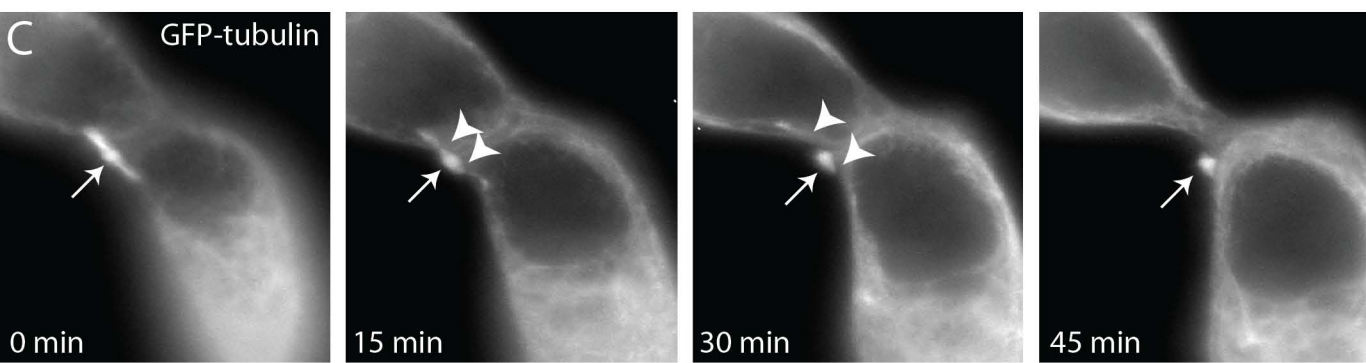

Supplement: jcs.081448_5.pdf [file jcs.081448_5.pdf]

A

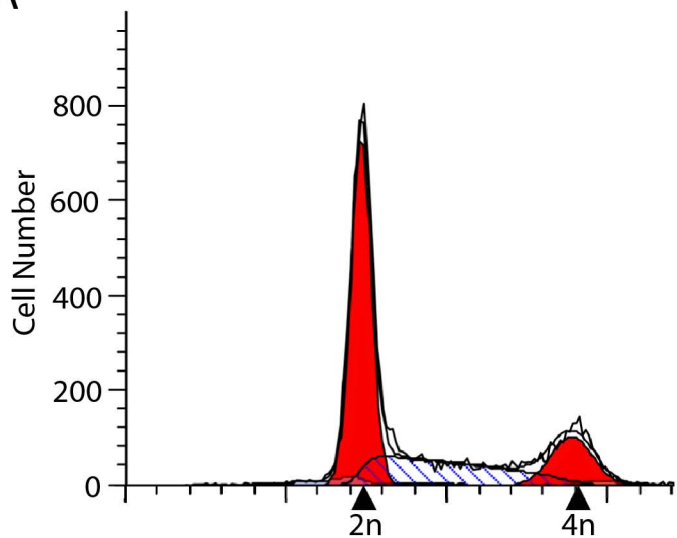

B

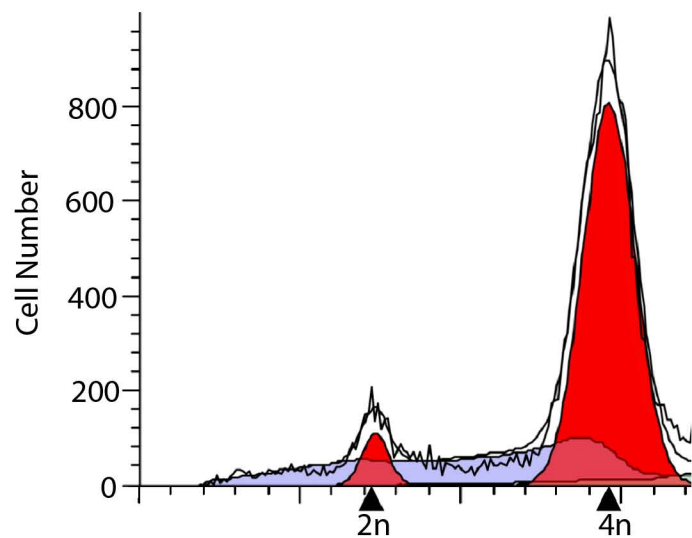

C

|             | G1      | S       | G2M     |
|-------------|---------|---------|---------|
| Control     | 57.15 % | 26.85 % | 16.00 % |
| Blebistatin | 6.55 %  | 0.00 %  | 93.45 % |
| Spastin-KD  | 50.55 % | 30.17 % | 19.28 % |

D

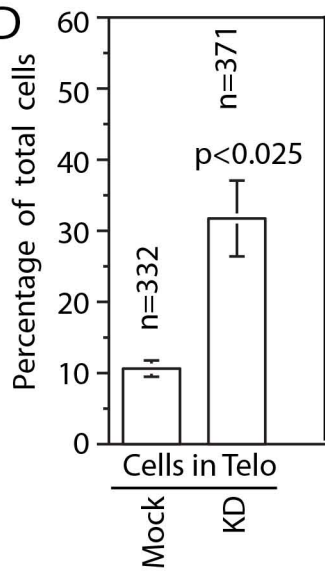

E

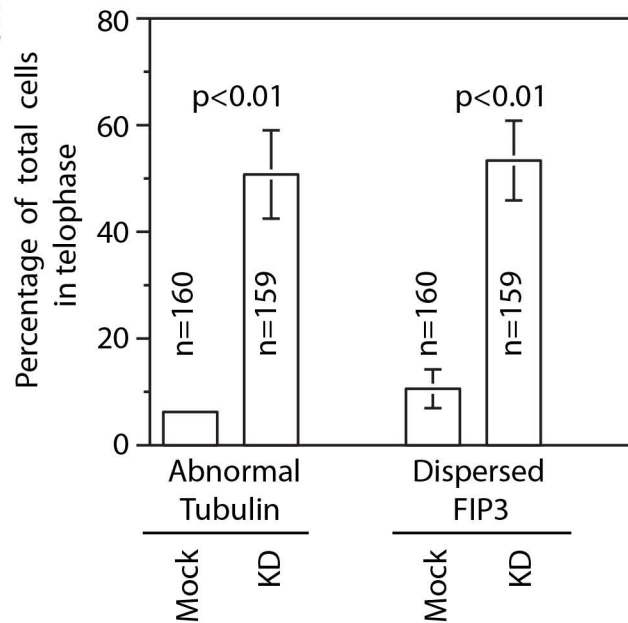

Supplement: jcs.081448_6.pdf [file jcs.081448_6.pdf]
